# Supplementary material for: Image-Based Annotation of Chemogenomic Libraries for Phenotypic Screening
Source: MDPI journal article supplement (doi:10.3390/molecules27041439), 2022-02-21
Supplement: s1 [file s1]

# Image-Based Annotation of Chemogenomic Libraries for Phenotypic Screening

Amelie Tjaden <sup>1,2</sup>, Apirat Chaikuad <sup>1,2</sup>, Eric Kowarz <sup>3</sup>, Rolf Marschalek <sup>3</sup>, Stefan Knapp <sup>1,2</sup>, Martin Schröder <sup>1,2,\*</sup> and Susanne Müller <sup>1,2,\*</sup>

- <sup>1</sup> Institute of Pharmaceutical Chemistry, Goethe University Frankfurt, Max-von-Laue-Str.9, 60438 Frankfurt, Germany; tjaden@pharmchem.uni-frankfurt.de (A.T.); chaikuad@pharmchem.uni-frankfurt.de (A.C.); knapp@pharmchem.uni-frankfurt.de (S.K.)
- <sup>2</sup> Structural Genomics Consortium, BMLS, Goethe University Frankfurt, Max-von-Laue-Str. 15, 60438 Frankfurt, Germany
- <sup>3</sup> Institute of Pharmaceutical Biology, Goethe University, Max-von-Laue-Str.9, 60438 Frankfurt, Germany; kowarz@em.uni-frankfurt.de (E.K.); rolf.marschalek@em.uni-frankfurt.de (R.M.)
- \* Correspondence: m.schroeder@pharmchem.uni-frankfurt.de (M.S.); susanne.mueller-knapp@bmls.de (S.M.)

## Table of contents

**Supplementary Figure S1: Hoechst33342 dye titration in HeLa cells after 20 h.**

**Supplementary Figure S2. Analysis of Cell Nuclei by Hoechst Channel Intensity level**

**Supplementary Figure S3: Fluorescence Spectrum of berzosertib**

**Supplementary Figure S4: Validation of Multiplex high Via protocol**

**Supplementary Figure S5: Hoechst High Intensity Object**

**Supplementary Figure S6: Viability analysis over nuclei gating protocol**

**Supplementary Figure S7: Phenotypical property analysis in HEK293T cells**

**Supplementary Figure S8: Phenotypical property analysis in MRC-9 cells**

**Supplementary Figure S9: Spectra Viewer visualization**

**Supplementary Table S1: Concentrations in  $\mu$ M of tested cell staining dyes**

**Supplementary Table S2: reference compounds tested in High-Via Extend protocol**

**Supplementary Table S3: Compounds tested in FUCCI Assay System**

**Supplementary Table S4: Additional data FUCCI assay (Excel)**

**Supplementary Table S5: References used for Multiplex protocol**

**Supplementary Table S6: Trainings set**

**Supplementary Table S7: Features of machine learning algorithm**

**Supplementary Table S8: Multiplex Chemogenomic data (Excel)**

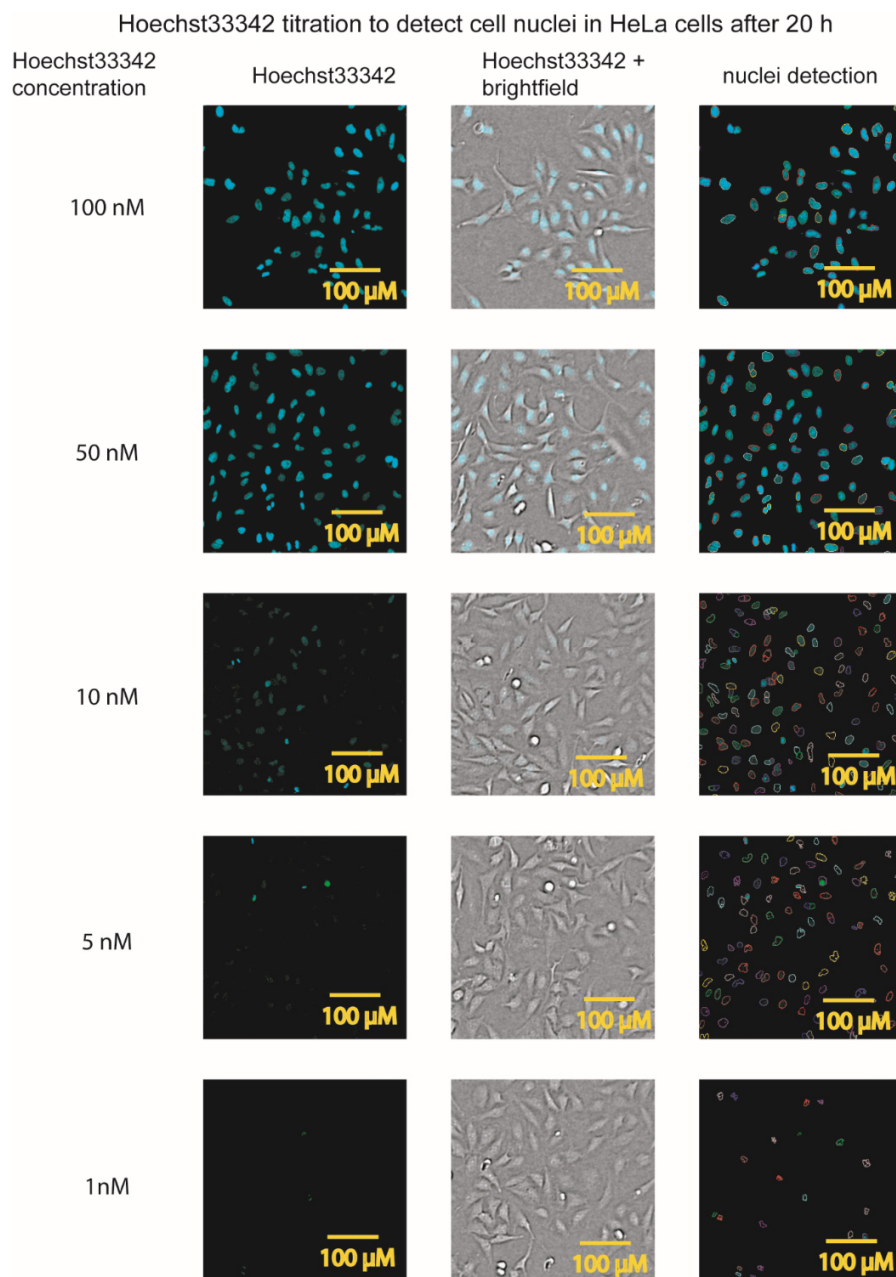

**Supplementary Figure S1: Hoechst33342 dye titration in HeLa cells after 20 h.** Fluorescence images, bright field images and nuclei detection of HeLa cells, after 20 h of exposure to different concentrations of Hoechst33342 stain (100 nM, 50 nM, 10 nM, 5 nM, 1 nM).

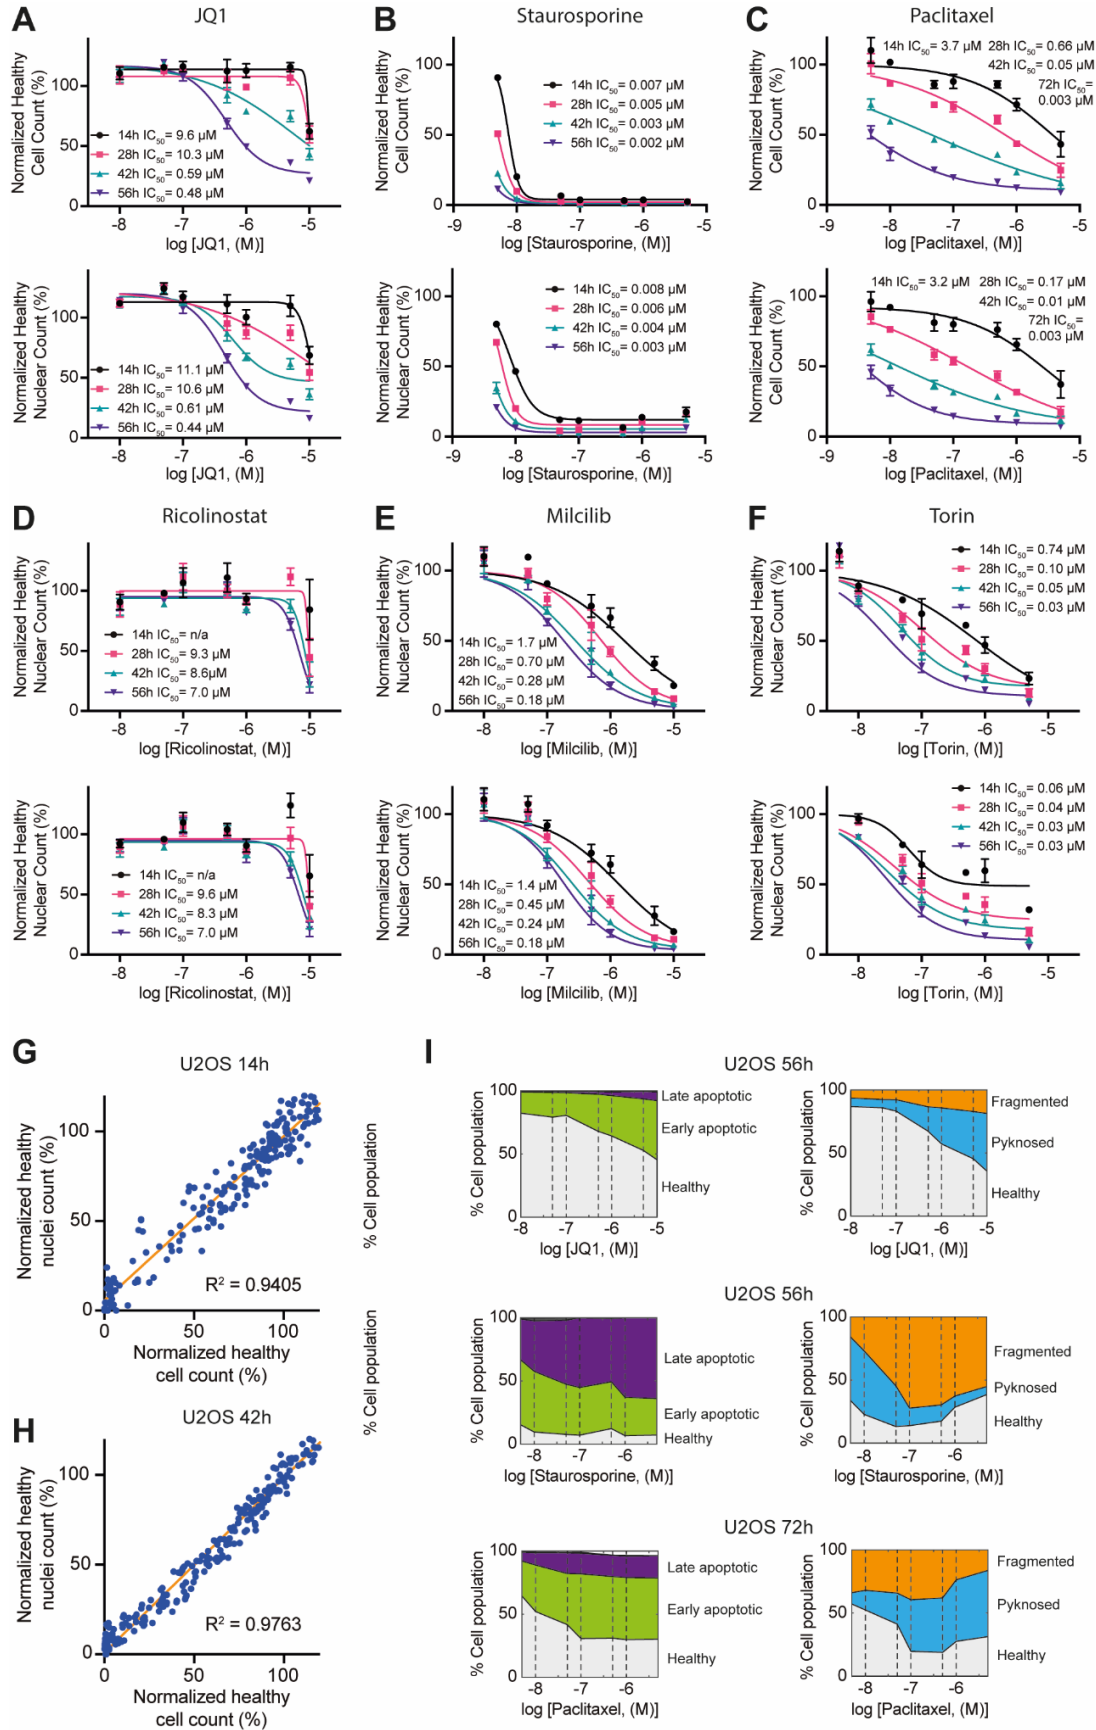

**Supplementary Figure S2. Analysis of Cell Nuclei by Hoechst Channel Intensity level**

**A** Normalized healthy cell count and normalized healthy nuclear count of different concentrations (0.01  $\mu$ M, 0.05  $\mu$ M, 0.1  $\mu$ M, 0.5  $\mu$ M, 1  $\mu$ M, 5  $\mu$ M, 10  $\mu$ M) of JQ1 exposure with calculated IC50 values after 14h, 28h, 42h and 56h. **B** Normalized healthy cell count and normalized healthy nuclear count of different concentrations (0.01  $\mu$ M, 0.05  $\mu$ M, 0.1  $\mu$ M, 0.5  $\mu$ M, 1  $\mu$ M, 5  $\mu$ M, 10  $\mu$ M) of staurosporine exposure with calculated IC50 values after 14h, 28h, 42h and 56h. **C** Normalized healthy cell count and normalized healthy nuclear count of different concentrations (0.01  $\mu$ M, 0.05  $\mu$ M, 0.1  $\mu$ M, 0.5  $\mu$ M, 1  $\mu$ M, 5  $\mu$ M, 10  $\mu$ M) of paclitaxel exposure with calculated IC50 values after 14h, 28h, 42h and 56h. **D** Normalized healthy cell count and normalized healthy nuclear count of different concentrations (0.01  $\mu$ M, 0.05  $\mu$ M, 0.1  $\mu$ M, 0.5  $\mu$ M, 1  $\mu$ M, 5  $\mu$ M, 10  $\mu$ M) of ricolinostat exposure with calculated IC50 values after 14h, 28h, 42h and 56h. **E** Normalized healthy cell count and normalized healthy nuclear count of different concentrations (0.01  $\mu$ M, 0.05  $\mu$ M, 0.1  $\mu$ M, 0.5  $\mu$ M, 1  $\mu$ M, 5  $\mu$ M, 10  $\mu$ M) of milciclib exposure with calculated IC50 values after 14h, 28h, 42h and 56h. **F** Normalized healthy cell count and normalized healthy nuclear count of different concentrations (0.05  $\mu$ M, 0.01  $\mu$ M, 0.05  $\mu$ M, 0.1  $\mu$ M, 0.5  $\mu$ M, 1  $\mu$ M, 5  $\mu$ M) of cisplatin exposure with calculated IC50 values after 14h, 28h, 42h and 56h. **G** Correlation between healthy cell count and healthy nuclei count after 14 h of compound exposure normalized to healthy cells exposed to DMSO 0,1% in U2OS cells. **H** Correlation between healthy cell count and healthy nuclei count after 42 h of compound exposure normalized to healthy cells exposed to DMSO 0,1% in U2OS cells. **I** Fractions of High Via gating and fractions of healthy, fragmented and pyknosed nuclei after exposure to different concentrations (0.01  $\mu$ M, 0.05  $\mu$ M, 0.1  $\mu$ M, 0.5  $\mu$ M, 1  $\mu$ M, 5  $\mu$ M, 10  $\mu$ M) of JQ1, staurosporine or paclitaxel in U2OS cells after 56h (JQ1, staurosporine) or 72h (paclitaxel) of compound exposure.

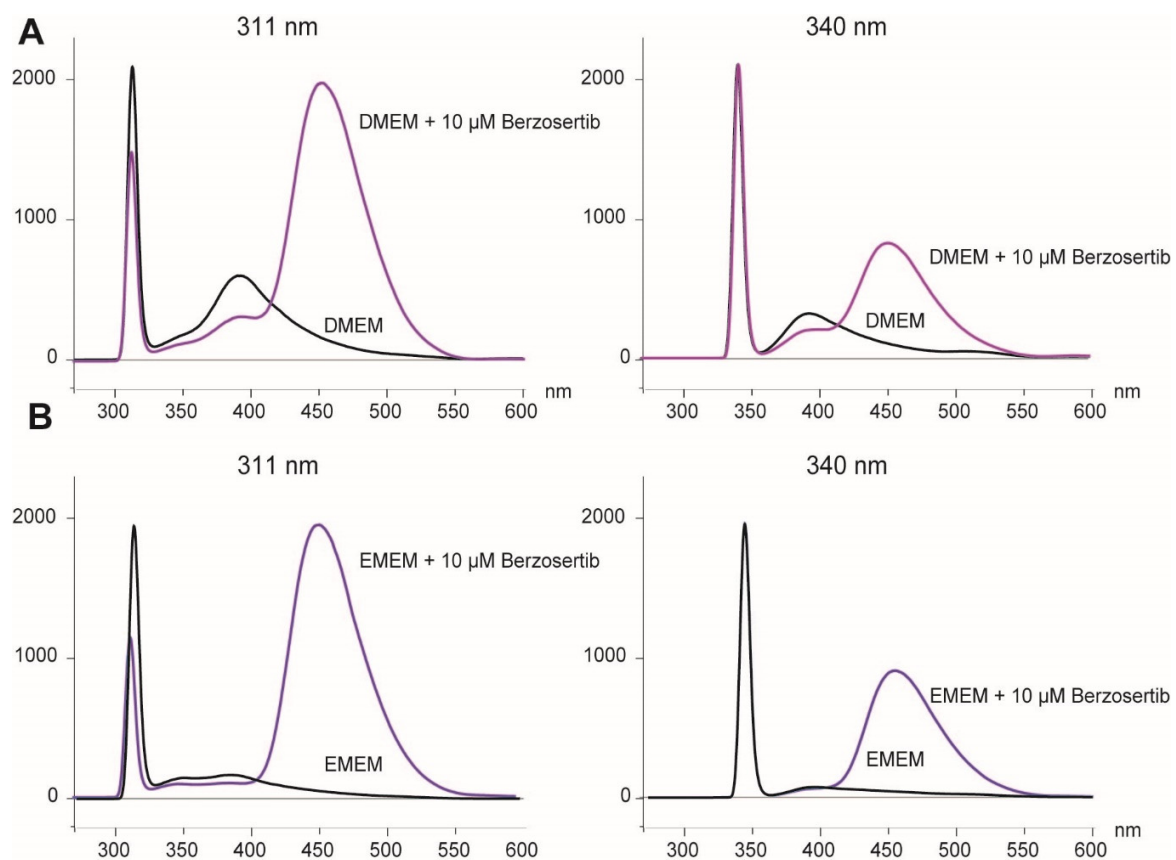

**Supplementary Figure S3: Fluorescence Spectrum of Berzosertib** **A** Fluorescence spectrum of Berzosertib 10  $\mu$ M in DMEM and DMEM alone at 311 nm and 340 nm. **B** Fluorescence spectrum of Berzosertib 10  $\mu$ M in EMEM and EMEM alone 311 nm and 340 nm

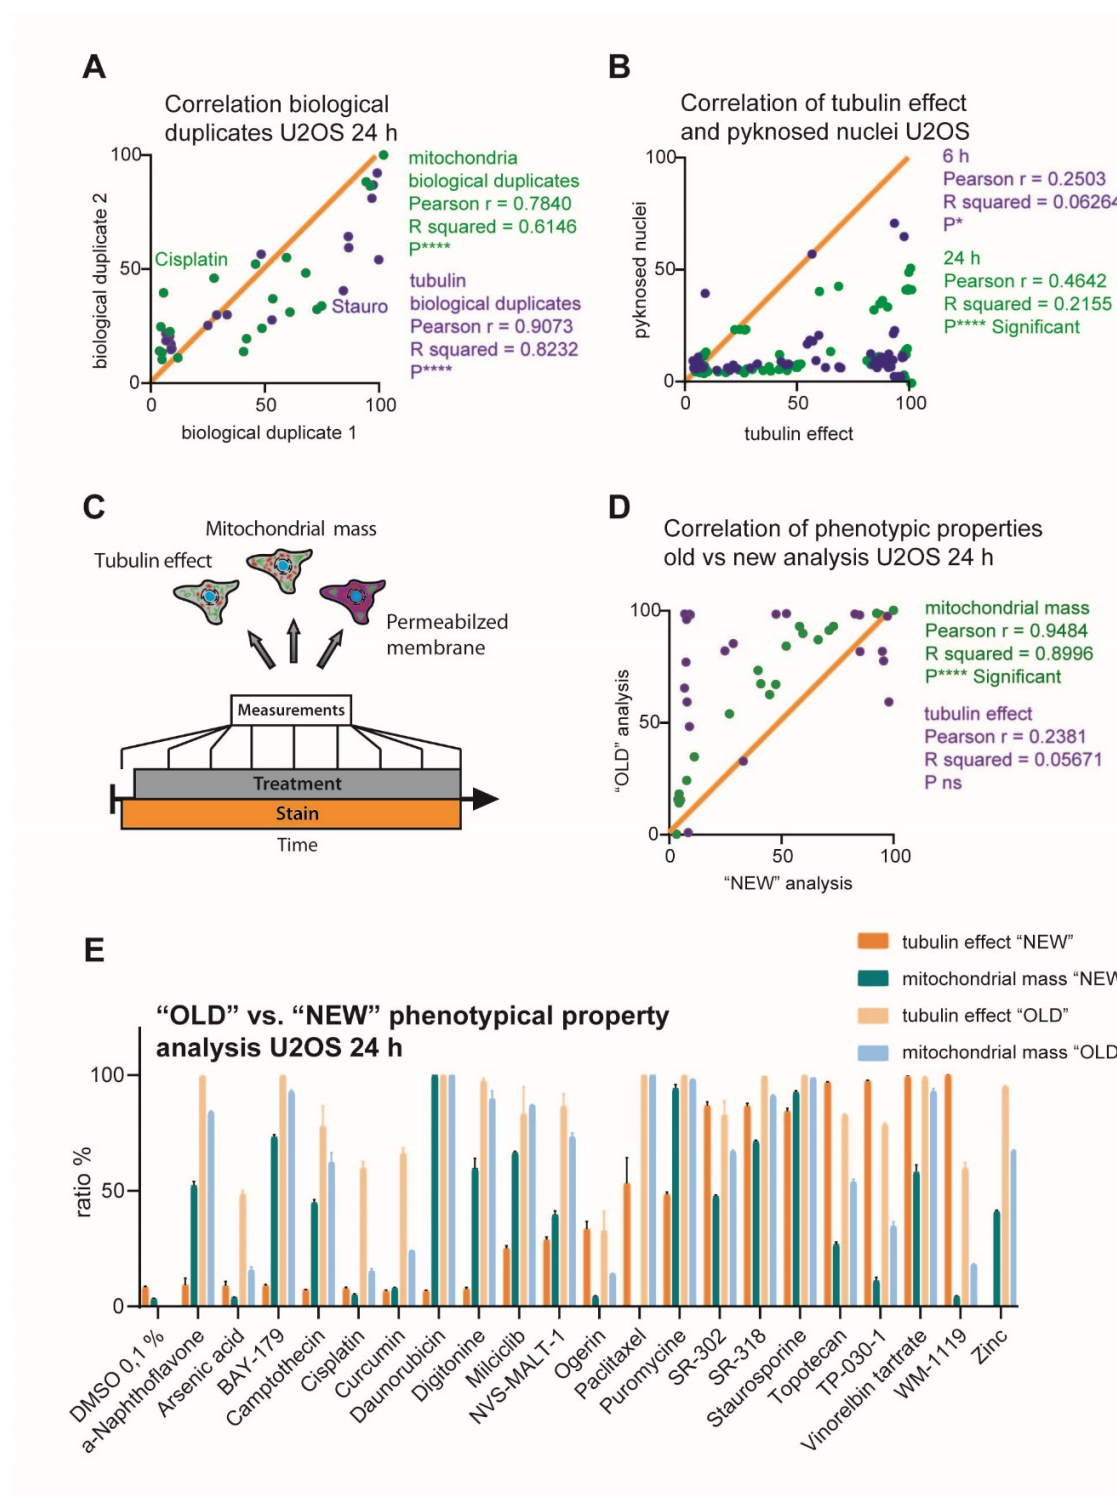

**Supplementary Figure S4: Validation of Multiplex high Via protocol** **A** Correlation of phenotypic analysis of tubulin mitochondrial mass increase of biological duplicates in U2OS cells after 24h. **B** Correlation of tubulin effect and pyknotic nuclei analysis in U2OS cells after 6

h (purple) and 24h (green). **C** General workflow of “old” analysis. **D** Correlation of “old” and “new” analysis of tubulin effect (purple) and mitochondrial mass (green) analysis in U2OS cells after 24h. **E** Cell count ratio of tubulin effect (orange) and mitochondrial mass increase (blue) of “old” and “new” analysis in U2OS cells after 24h of 10  $\mu$ M of compound exposure (Suppl. tabl.3) in comparison to DMSO 0.1%. Error bars show SEM of technical triplicates.

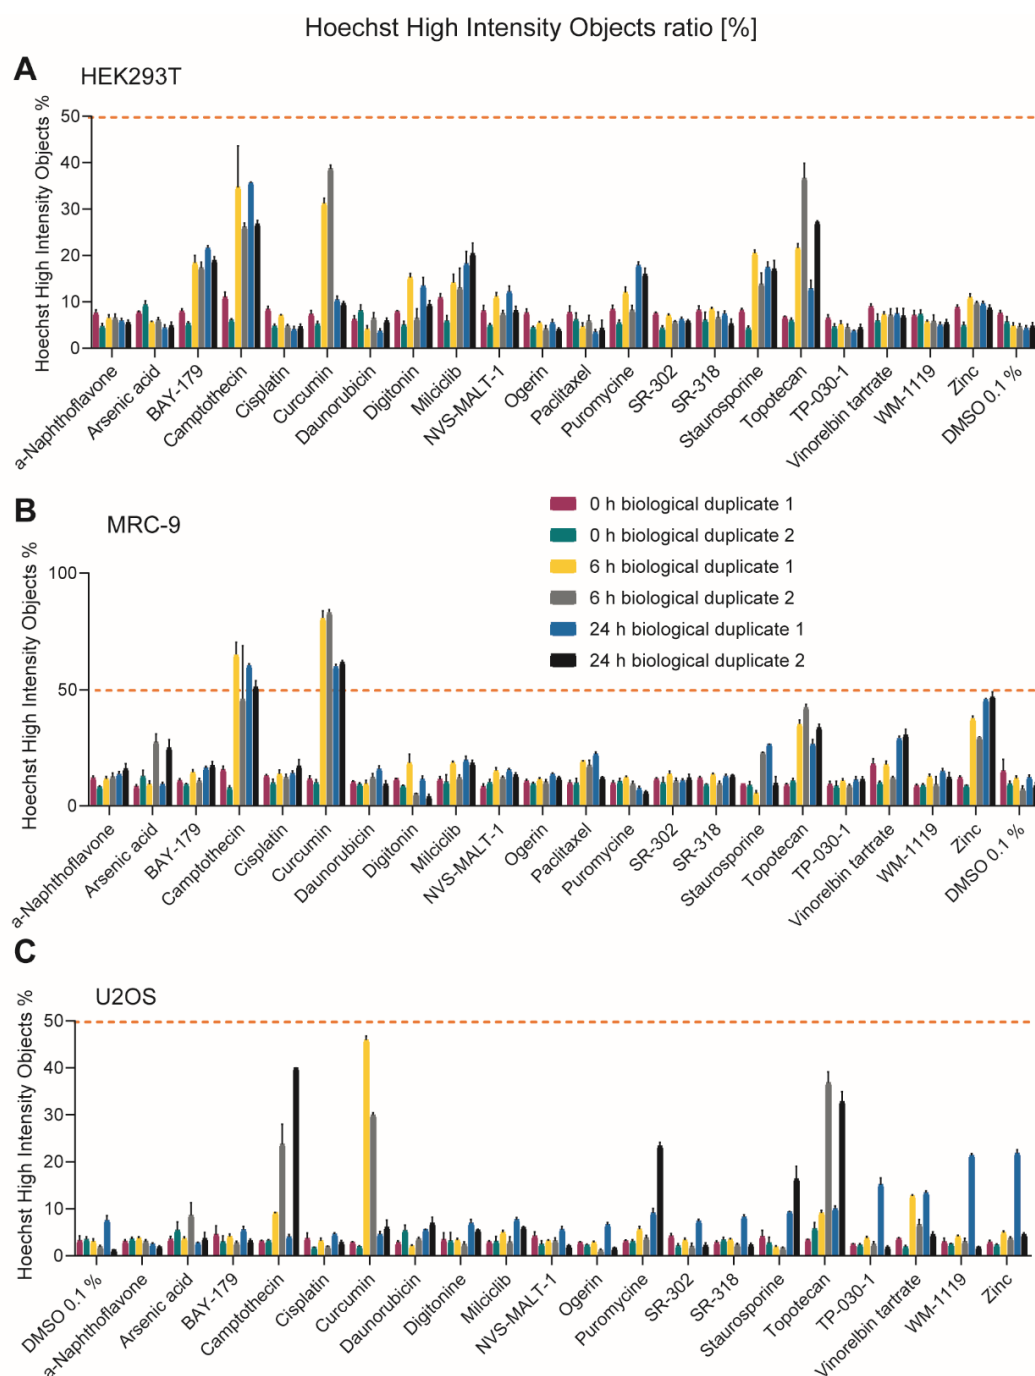

**Supplementary Figure S5: Hoechst High Intensity Object Analysis.** **A** Ratio of Hoechst High Intensity Objects after 0h, 6h and 24h of compound exposure (Supplementary Table S4) in HEK293T cells in comparison to DMSO 0.1% of biological duplicates. Error bars show SEM of technical triplicates. Property threshold at 50% marked red. **B** Ratio of Hoechst High Intensity Objects after 0h, 6h and 24h of compound exposure (Supplementary Table S4) in MRC-9 cells in

comparison to DMSO 0.1% of biological duplicates. Error bars show SEM of technical triplicates. Property threshold at 50% marked red. **C** Ratio of Hoechst High Intensity Objects after 0h, 6h and 24h of compound exposure (Supplementary Table S4) in MRC-9 cells in comparison to DMSO 0.1% of biological duplicates. Error bars show SEM of technical triplicates. Property threshold at 50% marked red.

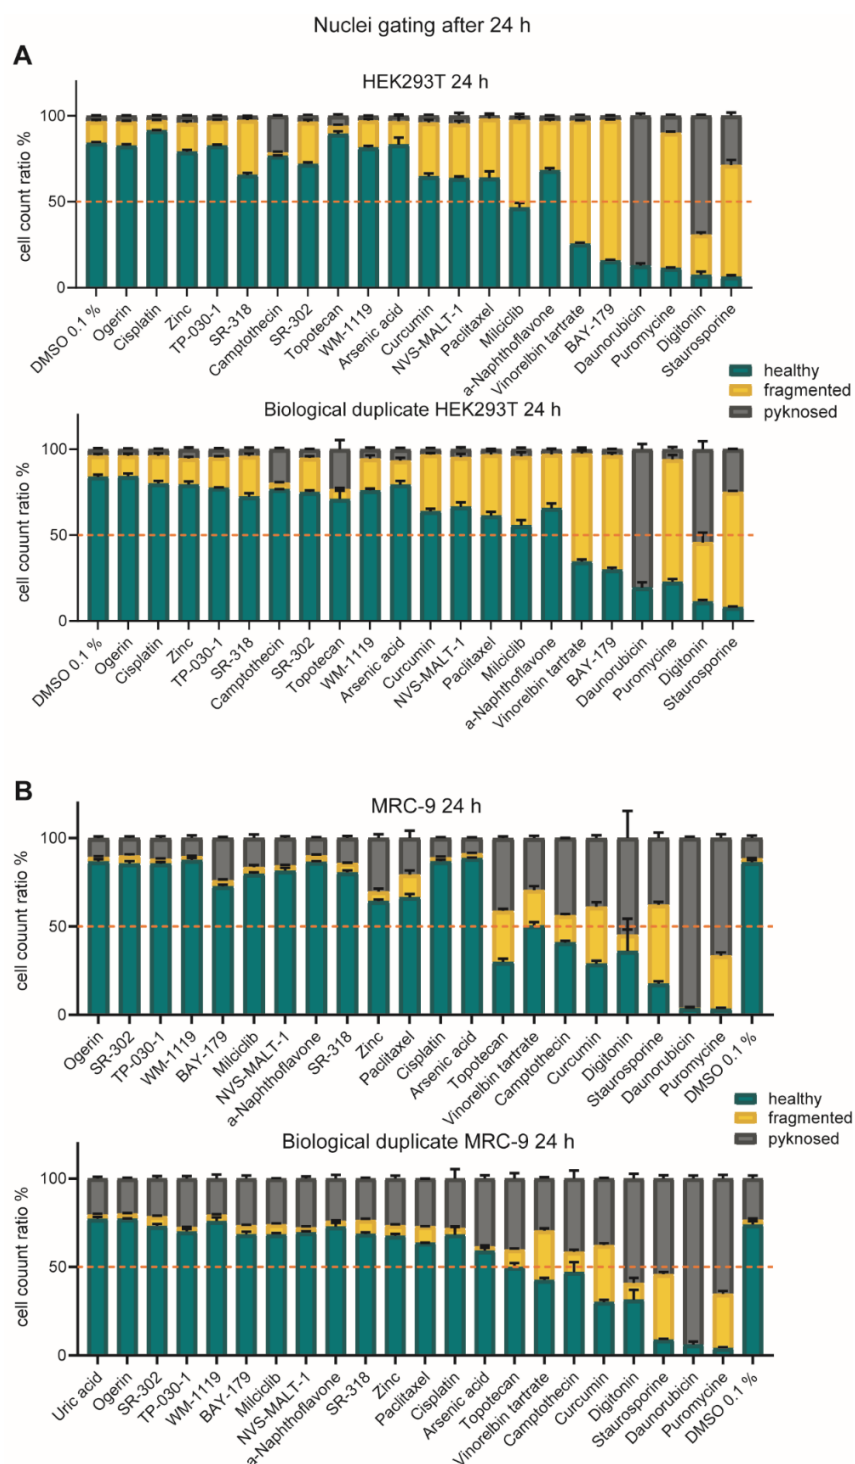

**Supplementary Figure S6: Viability analysis over nuclei gating protocol A** Cell count ratio of different Nuclei gating after 24h of 10  $\mu$ M of compound exposure (Supplementary Table S4) in comparison to DMSO 0.1% in HEK293T cells. Error bars show SEM of technical triplicates.

Property threshold at 50% marked red. Both biological duplicates are shown. **B** Cell count ratio of different Nuclei gating after 24h of 10  $\mu$ M of compound exposure (Supplementary Table S4) in comparison to DMSO 0.1% in MRC-9 cells. Error bars show SEM of technical triplicates. Property threshold at 50% marked red. Both biological duplicates are shown.

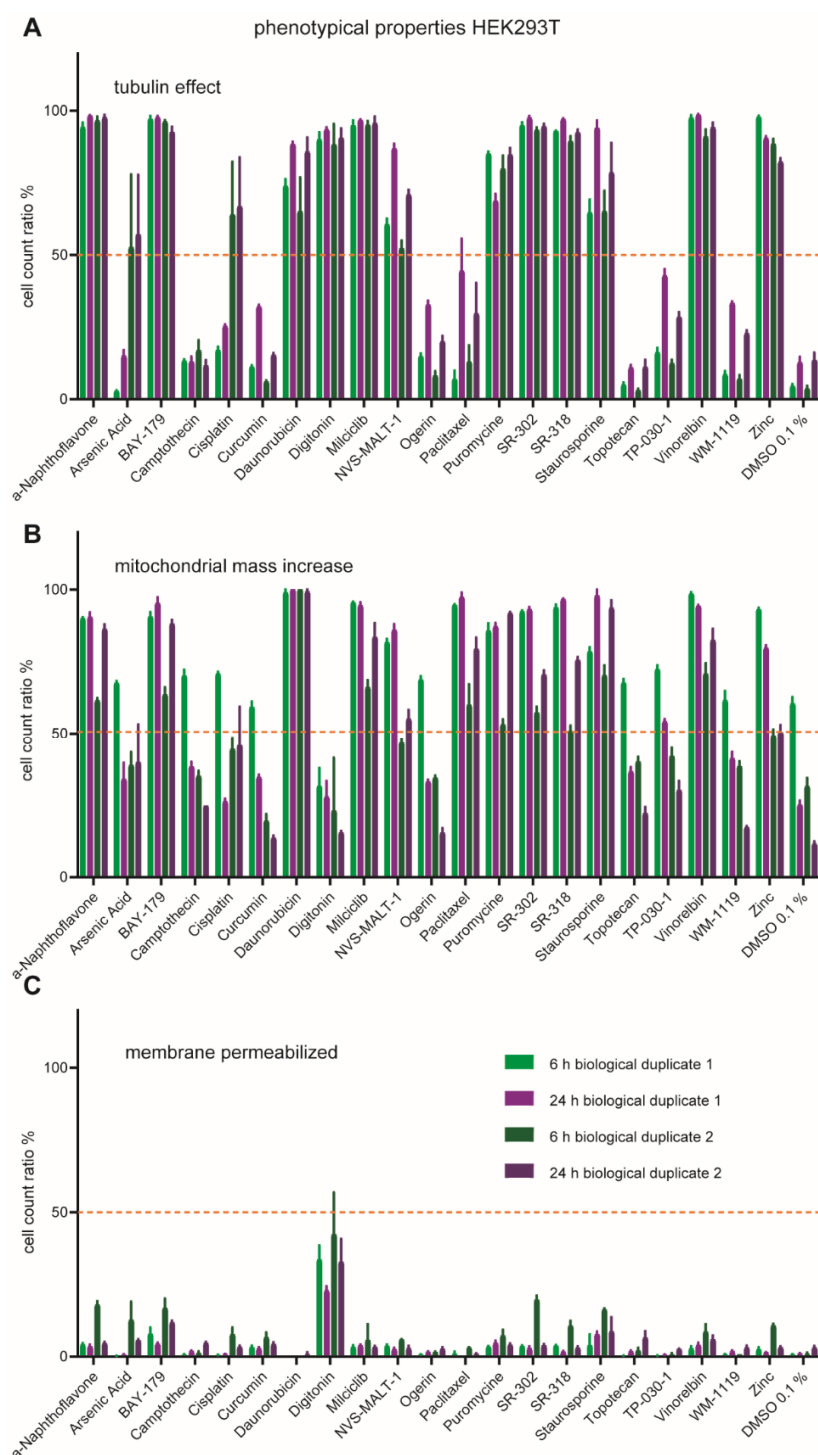

**Supplementary Figure S7: Phenotypical property analysis in HEK293T cells.** Cell count ratio of tubulin effect (S7 A), mitochondrial mass increase (S7 B) and membrane permeability (S7 C) of HEK293T cells after 6h and 24h of 10  $\mu$ M of compound exposure (Supplementary Table S4)

in comparison to DMSO 0.1%. Error bars show SEM of technical triplicates. Property threshold at 50% marked in red. Both biological replicates are shown.

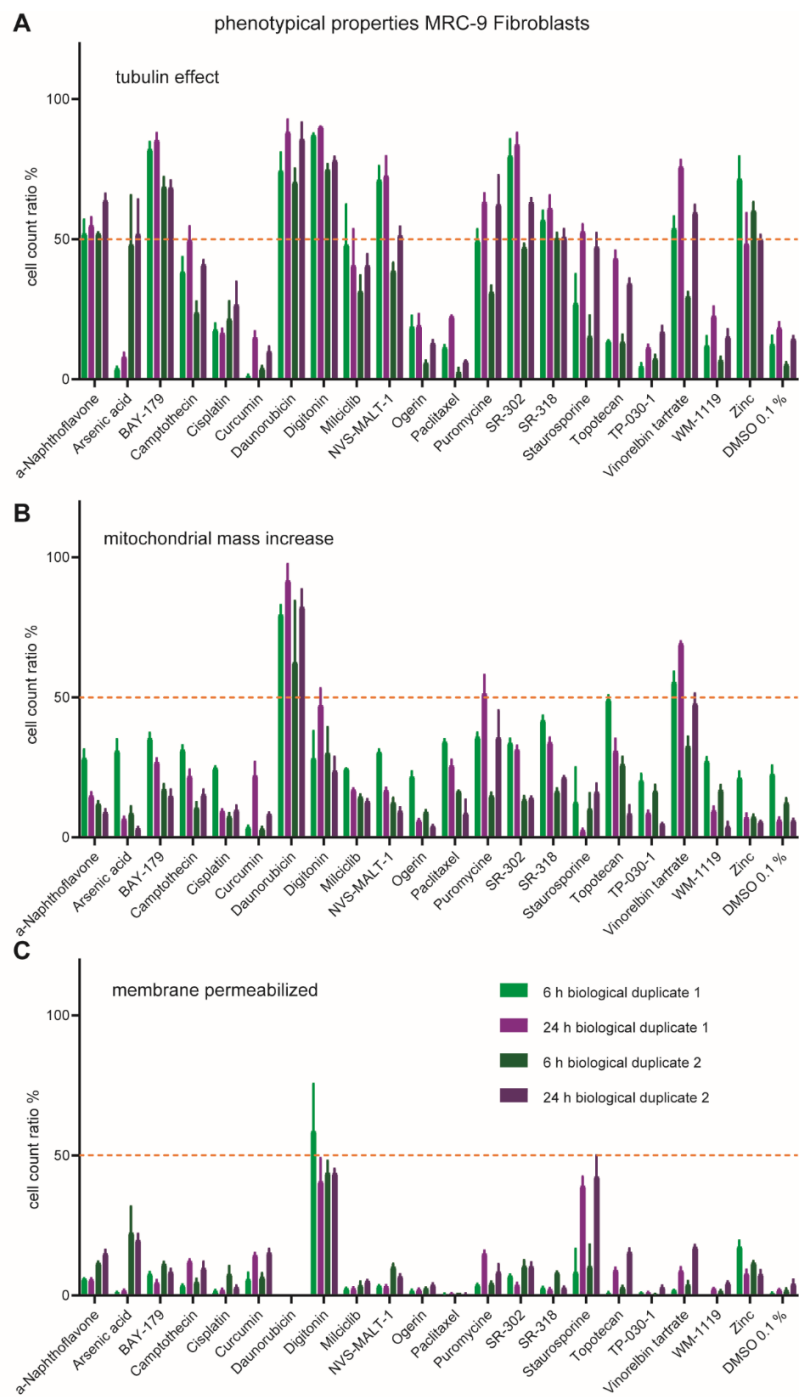

**Supplementary Figure S8: Phenotypical property analysis in MRC-9 cells.** Cell count ratio of tubulin effect (S7 A), mitochondrial mass increase (S7 B) and membrane permeability (S7 C) of MRC-9 cells after 6h and 24h of 10  $\mu$ M of compound exposure (Supplementary Table S4) in comparison to DMSO 0.1%. Error bars show SEM of technical triplicates. Property threshold at 50% marked in red. Both biological replicates are shown.

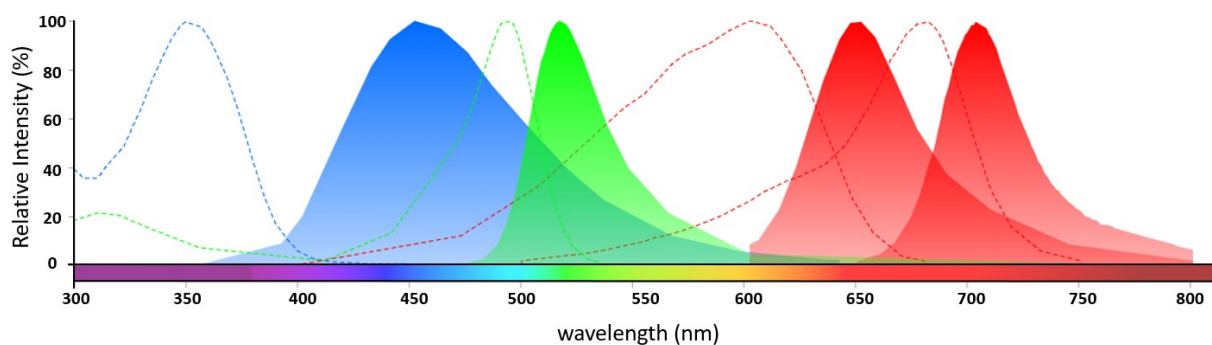

**Supplementary Figure S9: Spectra Viewer visualization.** Spectra Viewer visualization of fluorophore excitation and emission wavelengths (<https://www.thermofisher.com/uk/en/home/life-science/cell-analysis/labeling-chemistry/fluorescence-spectraviewer.html>). Hoechst (blue), BioTracker™ 488 Green Microtubule Cytoskeleton Dye (green), MitoTracker red (Red) and Annexin V Alexa Fluor 680 conjugate (deep red), as used in the protocol.

**Supplementary Table S1: Concentrations in  $\mu$ M of tested cell staining dyes.** Concentration used in described assays are marked in blue.

| number | Hoechst33342 | Yo-Pro-3 | BioTracker™ 488 Green Microtubule Cytoskeleton Dye | Mitotracker™ red | Mitotracker™ far red |
|--------|--------------|----------|----------------------------------------------------|------------------|----------------------|
| 1      | 0.02         | 0.1      | 1                                                  | 0.01             | 0.01                 |
| 2      | 0.035        | 0.5      | 2                                                  | 0.05             | 0.05                 |
| 3*     | 0.060        | 1        | 3                                                  | 0.075            | 0.075                |
| 4      | 0.085        | 3.5      | 4                                                  | 0.1              | 0.1                  |
| 5      | 0.130        | 5        | 5                                                  | 0.5              | 0.5                  |
| 6      | 0.170        | 10       | 6                                                  | 1                | 1                    |

\* concentration used in Multiplex and High Via Extend protocol

**Supplementary Table S2: reference compounds tested in High-Via Extend protocol**

| Reference compound   | Mode of action                                    | Predominant cell death type                  | IC 50 14 h | IC 50 26 h | IC 50 42 h | IC 50 56 h |
|----------------------|---------------------------------------------------|----------------------------------------------|------------|------------|------------|------------|
| <b>digitonin</b>     | detergent                                         | lysis                                        | 10.6       | 11.6       | 11.5       | 15.1       |
| <b>torin</b>         | mTOR kinase inhibitor                             | Apoptosis, autophagy                         | 0.8        | 0.8        | 0.7        | 0.7        |
| <b>ricolinostat</b>  | HDAC 6 inhibitor                                  | Apoptosis, cell cycle arrest                 | n/a        | 13.5       | 13.4       | 13.7       |
| <b>paclitaxel</b>    | targets tubulin/no disassembly of mitotic spindle | Apoptosis, tubulin binder, cell cycle arrest | > 2        | 0.1        | 0.06       | 0.05       |
| <b>staurosporine</b> | kinase inhibitor                                  | Apoptosis                                    | 0.005      | 0.004      | 0.003      | <0.001     |
| <b>JQ1</b>           | BET inhibitor                                     | Apoptosis, cell cycle arrest                 | 9.7        | 9.0        | 13.7       | 0.2        |
| <b>berzosertib</b>   | ATR/ATM-inhibitor                                 | Apoptosis, DNA damage response               | 62.7       | 64.1       | 58.7       | 56.5       |
| <b>milciclib</b>     | CDK inhibitor                                     | Apoptosis, cell cycle arrest                 | 2.1        | 0.8        | 0.6        | 0.5        |
| <b>camptothecin</b>  | topoisomerase inhibitor                           | Apoptosis, DNA damage reposne                | 2.6        | 2.3        | 1.5        | 1.1        |

**Supplementary Table S3: Compounds tested in FUCCI Assay System**

| compound        | mode of action                                  | concentration [μM] | known cell cycle effect                                      | main nuclei color | reference |
|-----------------|-------------------------------------------------|--------------------|--------------------------------------------------------------|-------------------|-----------|
| α-Naphtoflavone | flavone derivate, inhibitor of enzyme aromatase | 10                 | G1 cell cycle arrest                                         | red               | [39,35]   |
| Bromosporine    | bromodomain (BET) inhibitor                     | 10                 | increase of cells in G1 phase → cell cycle block             | red               | [74]      |
| Camptothecin    | topoisomerase inhibitor I                       | 10                 | mitotic arrest                                               | green             | [27,75]   |
| Daunorubicine   | topoisomerase inhibitor II                      | 10                 | DNA double strand breaks, cell cycle arrest                  | yellow            | [47]      |
| Doxorubicine    | topoisomerase inhibitor II                      | 10                 | G0/G1 cell cycle arrest after continuous treatment with 5 μM | yellow            | [76]      |

|               |                                                   |    |                                                                                     |        |            |
|---------------|---------------------------------------------------|----|-------------------------------------------------------------------------------------|--------|------------|
| HI-TOPK-032   | TOPK inhibitor                                    | 10 | TOPK serine/threonine kinase is phosphorylated during mitosis, G1 cell cycle arrest | yellow | [48]       |
| JH-XI-05-01   | SRPK1/2 inhibitor[1]                              | 10 | not described previously                                                            | red    | [77]       |
| Milciclib     | CDK inhibitor                                     | 10 | G1 cell cycle arrest                                                                | red    | [37,38]    |
| Mitoxantrone  | topoisomerase inhibitor II                        | 10 | delay in cell cycle progression                                                     | green  | [78,43,44] |
| Paclitaxel    | targets tubulin/no disassembly of mitotic spindle | 10 | concentration-dependent G1 or Mitosis cell cycle arrest                             | red    | [40,41]    |
| Panobinostat  | histone deacetylase (HDAC) inhibitor              | 10 | G1/S cell cycle arrest                                                              | green  | [79]       |
| Puromycine    | aminonucleoside antibiotic                        | 10 | effect on cell cycle checkpoints                                                    | red    | [80]       |
| Staurosporine | kinase inhibitor                                  | 10 | dose-dependent cell cycle arrest in G1 or G2                                        | green  | [81]       |
| T3-CLK        | CLK inhibitor                                     | 10 | G2/M cell cycle arrest                                                              | green  | [82]       |

**Supplementary Table S5: References used for Multiplex protocol**

| compound        | mode of action                                     | concentration [μM] |
|-----------------|----------------------------------------------------|--------------------|
| Ogerin          | positive allosteric modulator of GPR68 (DCP probe) | 10                 |
| TP-030-1        | RIPK1 inhibitor (DCP probe)                        | 10                 |
| WM-1119         | KAT6A, KAT6B inhibitor (DCP probe)                 | 10                 |
| SR-302          | DDR1, DDR2, MAPK11, MAPK14 inhibitor (DCP probe)   | 10                 |
| NVS-MALT1       | MALT1 allosteric inhibitor (DCP probe)             | 10                 |
| Zinc            | trace element, corrosive                           | 10                 |
| Cisplatin       | interfering in DNA replication                     | 10                 |
| Arsenic acid    | toxic and corrosive chemical compound              | 10                 |
| SR-318          | MAPK14 inhibitor (DCP probe)                       | 10                 |
| α-Naphtoflavone | flavone derivate, inhibitor of enzyme aromatase    | 10                 |
| BAY-179         | complex I inhibitor (DCP probe)                    | 10                 |
| Curcumin        | natural product                                    | 10                 |
| Milciclib       | CDK inhibitor                                      | 10                 |
| Paclitaxel      | targets tubulin/no disassembly of mitotic spindle  | 10                 |
| Topotecan       | topoisomerase inhibitor                            | 10                 |
| Digitonin       | detergent                                          | 10                 |
| Camptothecin    | topoisomerase inhibitor                            | 10                 |

|                      |                                                                      |    |
|----------------------|----------------------------------------------------------------------|----|
| Vinorelbine tartrate | vinca alkaloid, antimicrotubule agent                                | 10 |
| Staurosporine        | kinase inhibitor                                                     | 10 |
| Puromycine           | aminonucleosid antibiotic                                            | 10 |
| Daunorubicine        | anthracycline antibiotic, intercalate of DNA strands, ROS production | 10 |

**Supplementary Table S6: Trainings set.** Compounds to train the machine learning algorithm for Multiplex protocol

| reference compound   | mode of action                    | predominant cell death type  |
|----------------------|-----------------------------------|------------------------------|
| <b>digitonin</b>     | detergent                         | lysis                        |
| <b>paclitaxel</b>    | tubulin binder, cell cycle arrest | apoptosis                    |
| <b>staurosporine</b> | kinase inhibitor                  | apoptosis                    |
| <b>milciclib</b>     | CDK inhibitor                     | apoptosis, cell cycle arrest |
| <b>dms</b>           | solvent                           | healthy cells                |

**Supplementary Table S7: Features of machine learning algorithm**

Table.1: features used for machine learning algorithm in healthy/early apoptotic/late apoptotic/lysed and necrotic cells

| cell region | feature*           | cell region | feature*            |
|-------------|--------------------|-------------|---------------------|
| Cellbody    | Area               | Nuclei      | Area                |
| Cellbody    | Diameter           | Nuclei      | Diameter            |
| Cellbody    | Circumference      | Nuclei      | Circumference       |
| Cellbody    | Circularity        | Nuclei      | Circularity         |
| Cellbody    | Compactness        | Nuclei      | Compactness         |
| Cellbody    | Anisometry         | Nuclei      | Anisometry          |
| Cellbody    | mean intensity CH2 | Nuclei      | total intensity CH1 |
| Cellbody    | mean intensity CH3 | Nuclei      | mean intensity CH1  |
| Cellbody    | mean intensity CH4 | Nuclei      | mean intensity CH3  |

|          |                 |        |                 |
|----------|-----------------|--------|-----------------|
| Cellbody | mean peak CH2   | Nuclei | total peak CH3  |
| Cellbody | mean peak CH4   | Nuclei | total ridge CH1 |
| Cellbody | mean hole CH2   | Nuclei | mean ridge CH1  |
| Cellbody | mean hole CH4   | Nuclei | mean ridge CH3  |
| Cellbody | mean ridge CH2  |        |                 |
| Cellbody | mean valley CH2 |        |                 |
| Cellbody | mean valley CH4 |        |                 |
| Cellbody | mean edge CH4   |        |                 |
| Cellbody | mean saddle CH2 |        |                 |
| Cellbody | mean saddle CH4 |        |                 |

Table 2: features used for machine learning algorithm in healthy/pyknosed and fragmented cell nuclei

| cell region | feature*            | cell region | feature*        |
|-------------|---------------------|-------------|-----------------|
| Nuclei      | total intensity CH1 | Nuclei      | mean ridge CH1  |
| Nuclei      | total hole CH1      | Nuclei      | mean valley CH1 |
| Nuclei      | total valley CH1    | Nuclei      | mean edge CH1   |
| Nuclei      | total edge CH1      | Nuclei      | mean saddle CH1 |
| Nuclei      | total saddle CH1    |             |                 |
| Nuclei      | mean hole CH1       |             |                 |

Table S3: features used for machine learning algorithm in High Intensity Objects and Normal Intensity Objects based

| cell region | feature*           | cell region | feature*                                     |
|-------------|--------------------|-------------|----------------------------------------------|
| Cellbody    | mean intensity CH1 | Nuclei      | max intensity CH1                            |
| Cellbody    | min intensity CH1  | Nuclei      | Nuc_cell_area<br>Nuc Area / Cellbody<br>Area |
| Cellbody    | max intensity CH1  |             |                                              |

Table 4: features used for machine learning algorithm for Fucci assay in red/green and yellow nuclei

| cell region | feature*           | cell region | feature*       |
|-------------|--------------------|-------------|----------------|
| Cellbody    | mean intensity CH3 | Nuclei      | total peak CH3 |
| Cellbody    | mean peak CH2      | Nuclei      | total edge CH2 |
| Cellbody    | mean peak CH3      | Nuclei      | total edge CH3 |
| Cellbody    | mean hole CH2      | Nuclei      | mean edge CH2  |
| Cellbody    | mean hole CH3      |             |                |
| Cellbody    | mean ridge CH2     |             |                |
| Cellbody    | mean ridge CH3     |             |                |
| Cellbody    | mean valley CH2    |             |                |
| Cellbody    | mean valley CH3    |             |                |
| Cellbody    | mean saddle CH2    |             |                |
| Cellbody    | mean saddle CH3    |             |                |

Table 5: features used for machine learning algorithm in mitotic or apoptotic cells

| cell region | feature*            | cell region | feature*        |
|-------------|---------------------|-------------|-----------------|
| Cellbody    | total intensity CH4 | Nuclei      | total hole CH1  |
| Cellbody    | max intensity CH4   | Nuclei      | mean peak CH1   |
| Cellbody    | mean peak CH4       | Nuclei      | mean hole CH1   |
| Cellbody    | mean hole CH4       | Nuclei      | mean ridge CH1  |
| Cellbody    | mean ridge CH4      | Nuclei      | mean valley CH1 |
| Cellbody    | mean valley CH4     |             |                 |
| Cellbody    | mean saddle CH4     |             |                 |

Table 6: features used for machine learning algorithm in tubulin effect and no tubulin effect

| cell region | feature*            | cell region | feature*       |
|-------------|---------------------|-------------|----------------|
| Cellbody    | total intensity CH2 | Cellbody    | mean peak CH2  |
| Cellbody    | mean intensity CH2  | Cellbody    | mean ridge CH2 |
| Cellbody    | max intensity CH2   | Cellbody    | mean edge CH2  |

Table 7: features used for machine learning algorithm in mitochondrial mass increased and mitochondrial mass normal

| cell region | feature*            | cell region | feature*        |
|-------------|---------------------|-------------|-----------------|
| Cellbody    | total intensity CH3 | Cellbody    | mean peak CH3   |
| Cellbody    | mean intensity CH3  | Cellbody    | mean hole CH3   |
| Cellbody    | max intensity CH3   | Cellbody    | mean ridge CH3  |
| Cellbody    | total peak CH3      | Cellbody    | mean valley CH3 |
| Cellbody    | mean saddle CH3     |             |                 |

Table 8: features used for machine learning algorithm in membrane permeabilized and membrane normal

| cell region | feature*            | cell region | feature*        |
|-------------|---------------------|-------------|-----------------|
| Cellbody    | total intensity CH2 | Cellbody    | mean hole CH2   |
| Cellbody    | total intensity CH4 | Cellbody    | mean hole CH3   |
| Cellbody    | mean intensity CH2  | Cellbody    | mean ridge CH2  |
| Cellbody    | mean intensity CH3  | Cellbody    | mean ridge CH3  |
| Cellbody    | max intensity CH2   | Cellbody    | mean ridge CH5  |
| Cellbody    | mean peak CH2       | Cellbody    | mean valley CH2 |
| Cellbody    | mean peak CH3       | Cellbody    | mean valley CH3 |
| Cellbody    | mean peak CH5       | Nuclei      | Compactness     |
| Cellbody    | mean edge CH2       |             |                 |

\*

CH1: Hoechst33342 (DNA detection): Ex 405 nm/Em 447/60 nm, 500ms, 50%

CH2: BioTracker™ 488 Green Microtubule Cytoskeleton Dye (tubulin stain): Ex 488/Em 525/50 nm, 50 ms, 40%

CH3: MitoTracker red (mitochondrial mass detection): Ex 561 nm/Em 617/73 nm, 100 ms, 40%

CH4: Annexin V (apoptosis marker): Ex 640 nm/Em 685/40, 50 ms, 20%

CH5: bright field: 300ms, 100% transmission
